# Supplementary material for: Therapeutic potential of quercetin and metformin combination in restoring vascular function in type 1 diabetic rats
Source: Research Square preprint supplement (doi:10.21203/rs.3.rs-6935142/v1), 2025-07-23
Supplement: Supplementary file 1 [file bce0897697ef452c63924075.docx]

**Figure S1**


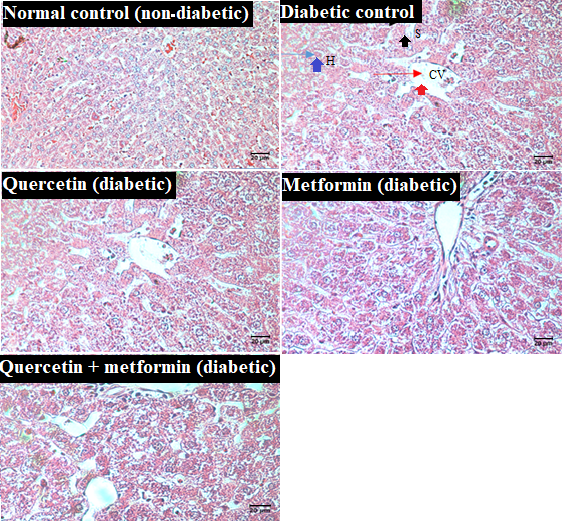


The effect of treatment on liver histology in T1D rats. Red arrow: Central vein (CV). Black arrow: Sinusoids (S). Blue arrow: Hepatocytes (H).

**Figure S2**


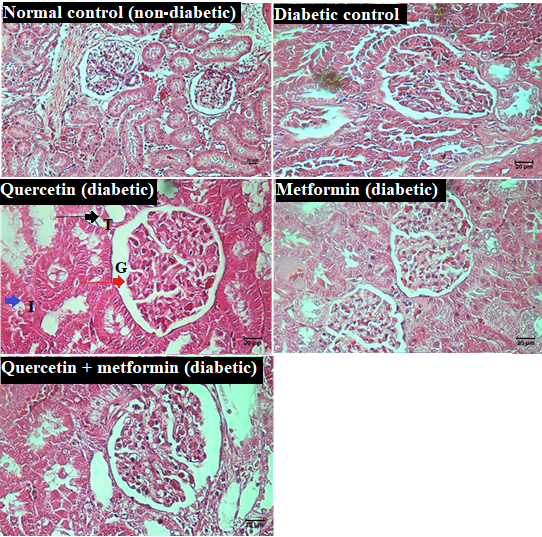


The effect of treatment on kidney histology in T1D rats. Red arrow: Glomerulus (G). Black arrow: Tubules (T). Blue arrow: Interstitium (I).

**Figure S3**


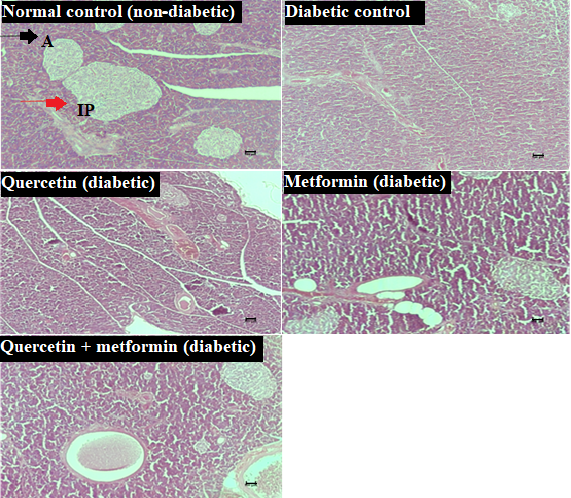


The effect of treatment on pancreas histology in T1D rats. Red arrow: Islets of pancreas (IP). Black arrow: Acini (A).

**Figure S4**


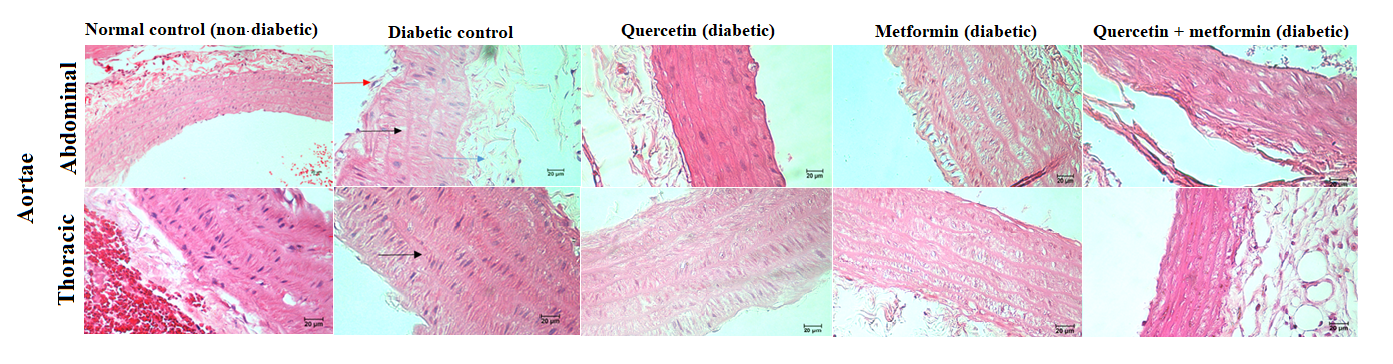


The effect of treatment on abdominal and thoracic aortae histology in T1D rats. Red arrow: Endothelium. Black arrow: Tunica media. Blue arrow: Tunica adventia.

**Figure S5**


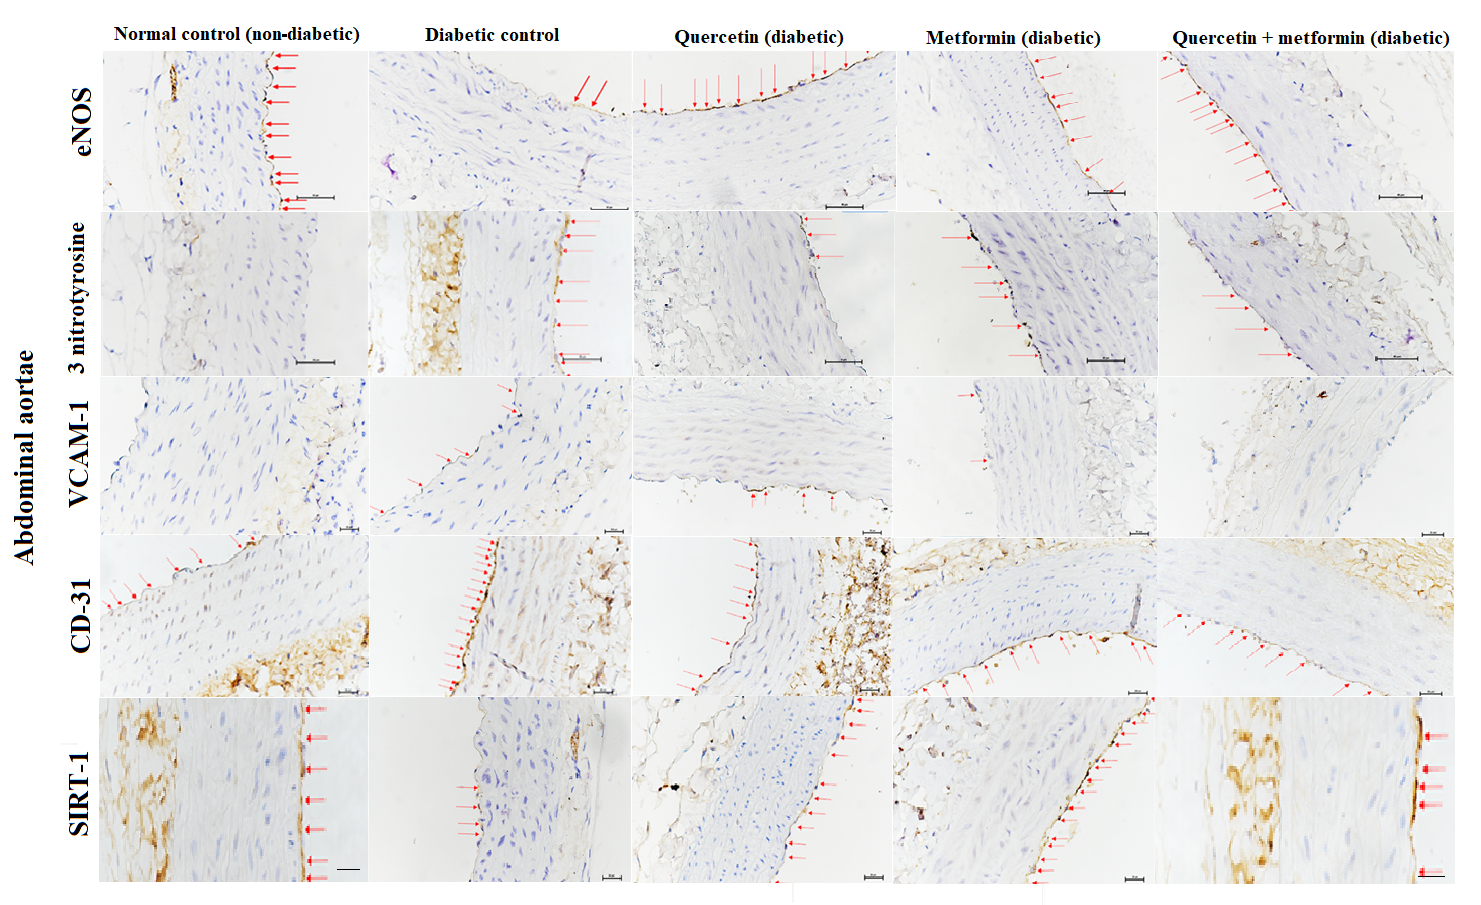


The effect of treatment on expression of nitric oxide synthase (eNOS), 3 nitrotyrosine, vascular cell adhesion molecule-1 (VCAM-1), cluster of differentiation-31 (CD-31), and sirtuin-1 (SIRT-1) in abdominal aortae of T1D rats.

**Figure S6**


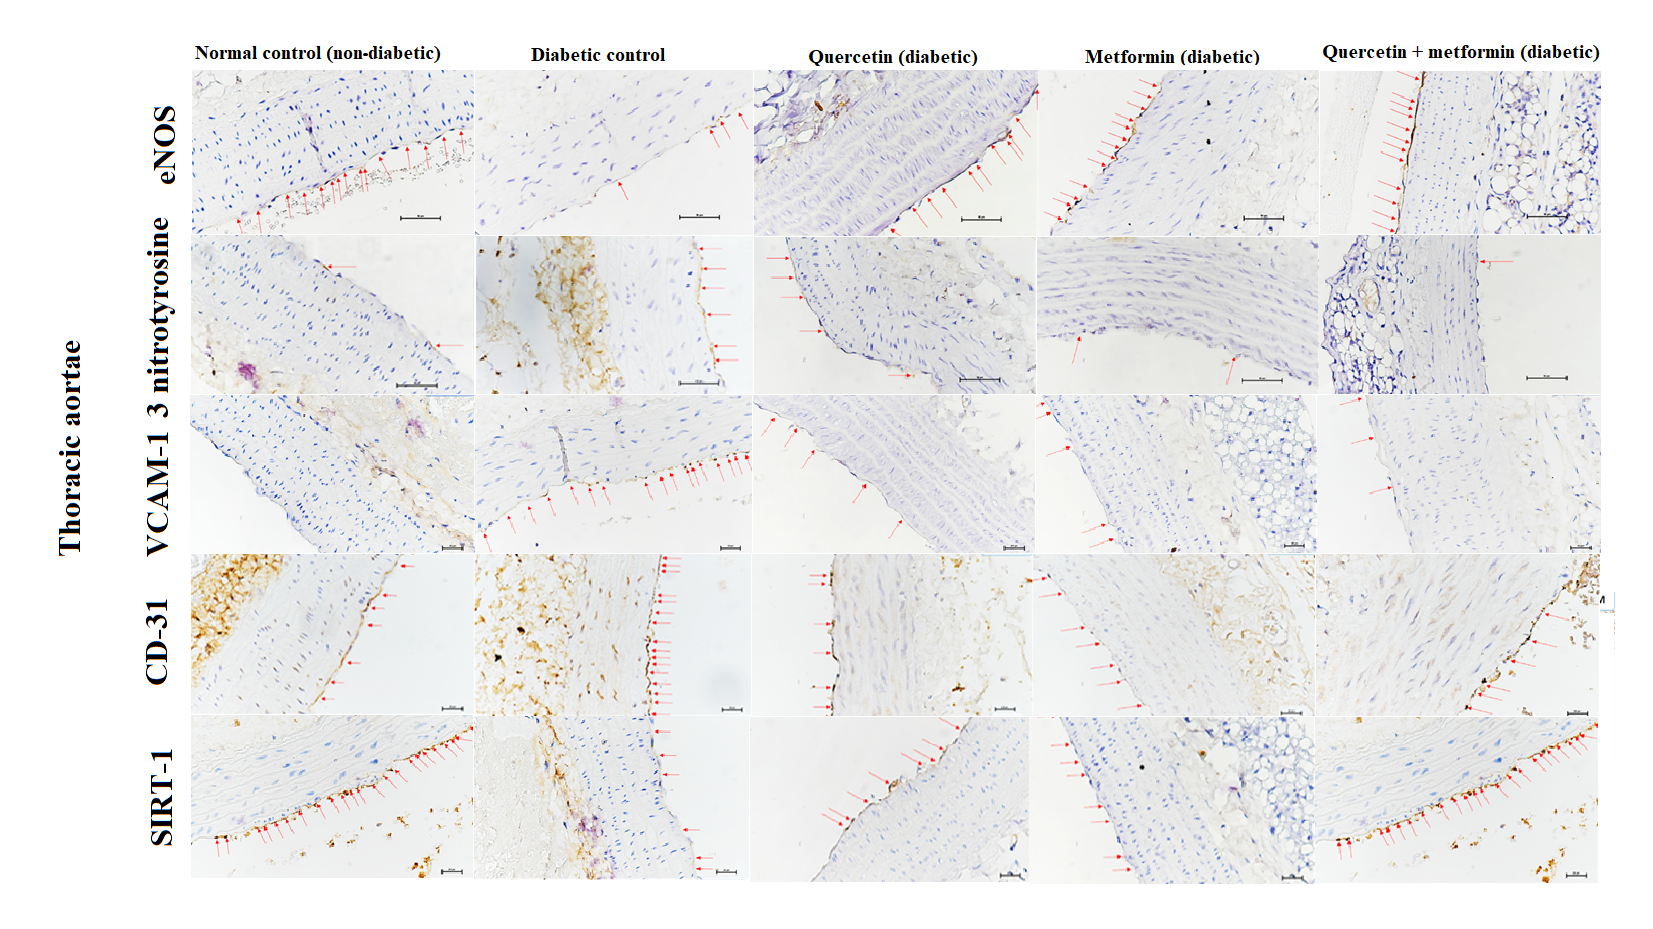


The effect of treatment on expression of nitric oxide synthase (eNOS), 3 nitrotyrosine, vascular cell adhesion molecule-1 (VCAM-1), cluster of differentiation-31 (CD-31), and sirtuin-1 (SIRT-1) in thoracic aortae of T1D rats.
